# Supplementary material
Source: Research Square preprint supplement (doi:10.21203/rs.3.rs-8386882/v1)
Supplement: Supplementary file 1 [file 08e447fcd946cc3ecac523a4.xlsx]

## Sheet: Planilha1
Chemical class	Compound name	RI	RIL	Compound code	ACE_01	ACE_04	ACE_03	AME_01	AME_03	AME_04	AME_05	AMO_01	AMO_03	AMO_04	AMO_05	ANA_01	ANG_01	ARO_01	BAB_03	BAB_04	BOL_02	BOL_03	BOL_04	BOL_05	BRA_01	BRA_03	BRA_04	BRA_05	CAJ_03	CAJ_05	CAN_02	CAN_03	CAN_04	CAP_01	CAP_03	CAP_05	CLI_01	CLI_02	CLI_03	CLI_04	CID_01	CAT_03	CAT_04	CAT_05	CID_02	CID_03	CID_04	CID_05	COE_01
Aliphatics	Acetone			COV_001
C5-Branched chain compounds	3-methyl-1-butanol	758	729 F	COV_002
N-Containing Compound	Pyrrole <methyl->	761	734 F	COV_003				20629054	5958858	279544	7173886
Aliphatics	Pent-(2Z)-enol	781	767 F	COV_004	3128864	2167412
Aliphatics	Octane <n->	801	800 F	COV_005																						803244
Aliphatics	Hexanal <n->	802	801 F	COV_006	19886161	4003892						3607140				7268175	1291962																								3680942				6542094	1628476		2503056
Aliphatics	(Z)-2-hexenal	851	852 S	COV_007																																									91073627	18477613	1588476	14158736
Aliphatics	Hex-(2E)-enal	851	850 F	COV_008	7936899							32971706				16703104																		2586374	428280
ND	NI (mz 43!, 72, 98)	856		COV_009				3264019
Aliphatics	Hex-(3Z)-enol	854	853 F	COV_010	303882614	139083538	69910346					144655357	22908728	186433745	40222683		1050173		373139	3296736	12335201	11781570	9385992	1177887							41501681	50037406	23209279	22038841	13594476	7336476	3673382	48399219	118858093	98886785	108424817	1821421			156081334	111744981
Benzenoids and phenyl propanoids	Benzene <ethyl->	860	857 F	COV_011																						1694888
Aliphatics	Hex-(2E)-enol	864	864 F	COV_012	11071904							13192294																													11875393				27682003	14918872
ND	NI (mz 41, 70, 98, 126)	869		COV_013																														3317882
Aliphatics	Hexanol <n->	869	867 F	COV_014	21978085	9604665	11912378					19375012	2671709	12763273	3144729	6630284															623319	930347	613207								6805647	422477			15437258	10518028		3233253
ND	NI (mz 43, 81, 109, 124)	888		COV_015																														2793767
Benzenoids and phenyl propanoids	Styrene	892	894 S	COV_016																												633228	435914
Aliphatics	2-Heptanone	893	890 S	COV_017
Aliphatics	Nonane <n->	902	900 F	COV_018																					3574933	1208631
Aliphatics	2-Heptanol	902	900 S	COV_019																											962087	661349	1139807
ND	NI (mz 79!, 94, 108)	919		COV_020				441191			128287
Aliphatics	Hex-(3Z)-enyl formate	921	920 F	COV_021	2466553
Monoterpenes	Tricyclene	921	923 F	COV_022												803503																											1024337	550479
ND	NI (mz 42,55,69,98!,) - sim. 1,2-Cyclopentanedione	924		COV_023
Monoterpenes	Thujene <alpha->	927	927 F	COV_024			6739909						1443975	3381535	2043737	1180738					69643052	550548351	192046399	238182227	435071																		844477	406862
Monoterpenes	Pinene <alpha->	932	933 F	COV_025			3819149						7860035	18317182	24794549	21674742					28875003	242709618	143601312	64439054	247856	1900247	3235037	1569101			312505	336166										5540840	67625101	38323032					144973
Monoterpenes	Fenchene <alpha->	948	948 F	COV_026																							141096	69141
Monoterpenes	Camphene	950	953 F	COV_027										1091014		31119808																										1017706	11195618	6197111
Monoterpenes	Thuja-2,4(10)-diene	953	953 F	COV_028																		18287198		2504089																				372879
ND	NI (mz 43, 57!,85!,114)	955		COV_029			7981119
Aliphatics	(E)-4-Oxohex-2-enal	959	958 NISTWEB	COV_030	4602119	2001030	5277035
Benzenoids and phenyl propanoids	Benzaldehyde	959	960 F	COV_031																								119382																		5764880	1147631	2248530
Monoterpenes	Sabinene	973	972 F	COV_032		25020287	51473942														38170989	366101417	52567309	110107521	612725																1807749				44480230	2768390	1439732	6804690
Monoterpenes	Pinene <beta->	975	978 F	COV_033									2212737	8850971	8304801	16305235					8462650	80549825	44629171	22731584	3309063																	2680363	21703237	11165960					532490
Aliphatics	1-Octen-3-ol	980	979 S	COV_034	1140936		4142863									27021781					63459496	55466052	27374330	8070056							14267282	12086092	33149001								96563088				71005267	21690008	783519	14038842
Aliphatics	Octan-3-one	987	986 F	COV_035												2959451					10126434	20407053	2503288	7281338																	8080453	601521	1364405	1218077	6840851
Irregular Terpenes	Hept-5-en-2-one <6-methyl->	987	986 F	COV_036													233362								616942	342531		63993					1459156		4604886	11211575	1256362	1842290	9157817	5894249									534824
Monoterpenes	Myrcene	991	991 F	COV_037		3653416	8459462														31858107	200503861	2723875	29590612	784758	379966	156069	42933						108697303	210722211	262872310	2968491	18428594	19306416	20145389	7540046		1713708	1004497	193567351	52018655	25284532	82349456
Miscellaneous Cyclic Compounds	Furan <2-pentyl->	993	991 F	COV_038
Benzenoids and phenyl propanoids	Mesitylene	993	994 F	COV_039												3165963
Aliphatics	3-octanol (Hexanol <ethyl->)	997	996 S	COV_040												10767694					9931177	31630879	5241611	3621598							569863	228746	2911592								27475399				29656898	3406165
Aliphatics	Decane <n->	1000	1000 F	COV_041																						412133
Aliphatics	Hexanoate <ethyl->	1000	1003 F	COV_042
Aliphatics	Octanal<n->	1004	1003 S	COV_043																																	2775118	16063924	18506182	15354496
ND	NI (mz 43, 59, 81, 99, 125, 143)	1001		COV_044																														2800752
Monoterpenes	Mentha-1(7),8-diene <p->	1003	1004 F	COV_045
Monoterpenes	Phellandrene <alpha->	1006	1007 F	COV_046
Aliphatics	Hex-(3Z)-enyl acetate	1009	1008 F	COV_047	9515163							209579413	75373423	258910308	89702795	9461949			673627	2505552	54238402	92175370	9431365	5619205							1569421	17822085	810951	4307489	1260027		140905	15591823	57524873	62139479	20596889				7830195	8130887
Benzenoids and phenyl propanoids	Anisole	1010	1009 F	COV_048
Monoterpenes	Carene <delta-3->	1010	1009 F	COV_049		14115889	43419032																	4971686																									97004
Aliphatics	Hexyl acetate	1015	1012 F	COV_050								8301308	13680888	16105098	12009502	5454660
Aliphatics	Hex-(2E)-enyl acetate	1017	1017 F	COV_051								4076951
Monoterpenes	Terpinene <alpha->	1018	1018 F	COV_052			11663194															14973724		1597243	1146991																2515356				36408820	7315949		18569516
Monoterpenes	Cymene <para->	1025	1025 F	COV_053			4628313					2721500		3737459		10194716						36769515	1824419	14597662		1006819	262628	43701								3455980					50808053	119474	1200663	913113	196470539	122868148		82940049	702881
Monoterpenes	Limonene	1029	1030 F	COV_054		22388165	66095595					2648304		21657418							26480953	221481230	9962692	124028926	6853837	10721396	6963362	1038160				2813075	1230186		2438004	51421423	9239434	176896962	235257155	244864424	5687647	1954973	10571835	6572111	24009760	7051068	2284200		4059526
Monoterpenes	Silvestrene	1029	1031 F	COV_055
Monoterpenes	Phellandrene <beta->	1030	1031 F	COV_056
Monoterpenes	Eucalyptol	1032	1032 F	COV_057												45328050
Aliphatics	Hexanol <2-ethyl->	1032	1030 F	COV_058													895101
Benzenoids and phenyl propanoids	Benzyl alcohol	1033	1031 A	COV_059																																										5217594			703663
Monoterpenes	Ocimene <(Z)-, beta->	1039	1039 S	COV_060								3245401									37306580	154634581	1635284	9712963										7075094	11667599	12620789	3216321	48490221	58135018	48742368					7046342	3441299	682686	3364751
ND	NI (mz 55, 83!, 112, 122)	1034		COV_061	4577409
Aliphatics	Heptyl acetate <2->	1045	1043 A	COV_062
Monoterpenes	Ocimene <(E)-, beta->	1049	1046 F	COV_063			9553794					115830397		598523							324303932	512583352	25754194	62046200	399045									3676918	8226177	9658724	3219265	28269222	38497923	32987898	5687647				125270075	22074707	5158741	41185092
ND	NI (mz 41, 69,95, 123, 138)	1054		COV_064																														3970048
Monoterpenes	Bergamal	1054	1053 F	COV_065																																	2411319	7490901	13824200	11630175
Miscellaneous Cyclic Compounds	7-Methyl-1,6-dioxaspiro(4,5)decane (conophthorin)	1057	1061 S	COV_066																																						834044	2350753	426192
Benzenoids and phenyl propanoids	Cresol <ortho->	1055	1051 F	COV_067
Aliphatics	2-Octenal	1058	1059 F	COV_068
Monoterpenes	Terpinene<gamma->	1058	1058 F	COV_069																		24884472	5103648	9730971																	28265004			455345	382447088	80670105	2108912	106900663	1068243
ND	NI (mz (43, 57!, 85, 111, 136)	1059		COV_070	15817423		19682008
ND	NI (mz 45, 55, 87!, 115, 157)	1062		COV_071
Monoterpenes	Sabinene hydrate <cis->	1067	1069 F	COV_072												13749578					3539681	33213103	2270173	3535639	488602																2977912				181543609	9300977	6226593	6798303	258335
Aliphatics	Octenol <2-trans->	1068	1067 F	COV_073																											66980		1171324
Aliphatics	Octanol <n->	1071	1076 F	COV_074																																													12407063
Monoterpenes	(Z)-Linalool oxide furanoid	1072	1069 F	COV_075
ND	NI (mz 43, 71, 99!, 124, 142)	1073		COV_076
Aliphatics	4-Nonanone	1074	1078 F	COV_077																																	6591693	63342294	77786010	49879919
ND	NI (mz 43,55,126!)	1075		COV_078
ND	NI (mz 91, 107!, 135!, 150!, 164)	1076		COV_079																																					3911657				14633042	13249294	4463316	4323908
Benzenoids and phenyl propanoids	p-cresol	1077	1074 S	COV_080
Aliphatics	cf. 1-Nonen-3-ol	1080		COV_081												817002
Monoterpenes	Isoterpinolele	1086	1086 NW	COV_082
Monoterpenes	Linalool oxide <trans->	1087	1086 F	COV_083
Monoterpenes	Fenchone	1087	1086 A	COV_084																																								347645
Monoterpenes	Terpinolene	1089	1086 F	COV_085			9995898									1403137						18040634	973133		623599													5438140	8266447	9154175	1163334				20932986			5553337
Monoterpenes	p-Cymenene	1089	1093 F	COV_086
Monoterpenes	(E)-Linalool oxide furanoid	1090	1091 S	COV_087																														3287585															710520
ND	NI (mz 41, 67, 79, 95, 121, 136)	1091		COV_088
Aliphatics	2-Nonanone	1093	1093 S	COV_089
Benzenoids and phenyl propanoids	Guaiacol	1093	1094 S	COV_090
ND	NI (mz 43, 69, 98!, 109, 122,140)	1094		COV_091
Benzenoids and phenyl propanoids	Methyl benzoate	1095	1096 F	COV_092																					363980							964401	3018254		10044830														2569639
Monoterpenes	Epoxymyrcene<6,7->	1095	1096 F	COV_093																														9161482		1950628									8149218	6320320	1593710	2047125
ND	NI (mz 41, 69!, 83, 95, 109, 152)	1098		COV_094																	14897747	9552304
Monoterpenes	Sabinene hydrate <trans->	1098	1099 F	COV_095												2883165									406132																2060532				168048461	7951218	2892910	4516712
Monoterpenes	Linalool	1100	1101 F	COV_096			12194278					5878078		3122373		6337599						21314671			4694614	994594	1804065	836994			279939		1056928	25241732	28058100	17182090	10889511	48362367	33749653	57786085	10420990			5090306	279519086	72568838	32247062	55266611	22373953
Aliphatics	Undecane <n->	1101	1100 F	COV_097																																						589590	3730294	2168268
Monoterpenes	cf. Filifolone	1103	1103 NISTWEB	COV_098												26394118
Aliphatics	Nonanal <n->	1105	1107 F	COV_099																						717579					130996																		3008013
ND	NI (mz 43, 91, 109,119, 134, 152)	1107		COV_100
ND	NI (mz 91, 107, 122, 150)	1109		COV_101												3832598
Monoterpenes	(Z)-Rose oxide	1111	1112 F	COV_102
Monoterpenes	Menthatriene<1,3,8-para->	1111	1110 F	COV_103																					304558
Benzenoids and phenyl propanoids	Phenethyl alcohol	1112	1113 F	COV_104		2871021	10580364
Monoterpenes	trans-Chrysanthenol	1114	1114 NISTWEB	COV_105												6740042
Aliphatics	1-Octen-3-ol, acetate	1115	1109 F	COV_106
Irregular Terpenes	Nona-1,3,7-triene <4,8-dimethyl-, (E)->	1116	1113 F	COV_107																	15326399	26749390
ND	NI (mz 79, 93, 105, 121, 135,150)	1116		COV_108																														8526381
ND	NI (43, 81!, 93, 107!, 137, 152)	1120		COV_109												2889007
ND	NI (mz 55!,70,83,98!108,126)			COV_110		346111
Monoterpenes	Mentha-2,8-dien-1-ol <trans-, para->	1121	1122 F	COV_111																					430204
Monoterpenes	Chrysanthenone	1124	1122 F	COV_112												20774445
ND	NI (mz 43, 55, 83, 98, 111, 126)	1124		COV_113
ND	NI (mz 81!, 137, 152)	1124		COV_114																																									7546565	5088576		2812502
ND	NI (mz 43, 55, 83, 98, 111, 126)	1129		COV_115
Monoterpenes	Allo-Ocimene	1130	1132 S	COV_116																														3274493				8472803	35569957	22250309
ND	NI (mz 93, 111, 121, 139, 167)	1131		COV_117																					838441
Monoterpenes	Rose oxide <trans->	1131	1126 F	COV_118
ND	NI (mz 43,56,72,86,102!,128)	1133		COV_119
ND	NI (mz 41, 55, 69, 80, 85) - sim. Linalool, methyl ether	1136		COV_120
Monoterpenes	Pinocarveol <trans->	1138	1141 F	COV_121												4630792
ND	NI (mz 70!, 81, 109, 123)	1140	1141 F	COV_122																																									13912185	6993645	3448453	4731073
Miscellaneous Cyclic Compounds	2,3-Dihydro-3,5-dihydroxy-6-methyl-4H-pyran-4-one	1142		COV_123
Monoterpenes	Myroxide <(E)->	1142	1141 F	COV_124																	20484231	28931703		1425585
Monoterpenes	Sabinol <trans->	1145	1140 F	COV_125
Aliphatics	Butanoate <3-methyl-2-butenyl 3-methyl->	1145	1149 F	COV_126
Monoterpenes	Isopulegol Isomer I	1146	1149 F	COV_127																					701311	252861	158076											40457680
Monoterpenes	Camphor	1146	1149	COV_128												22818792															37342		1251405									877654	2030998	6466127					528690
ND	NI (mz 41, 69!, 109, 137, 152)	1147		COV_129																														20487030		26183964					12972926				107255436	90002547	22916150	28177021
Benzenoids and phenyl propanoids	Veratrole	1148	1147 F	COV_130
ND	NI (43, 91, 109!, 119, 134, 152)	1149		COV_131
ND	NI (mz 81, 95, 123!, 137, 152)	1151		COV_132																														11648587			12039382			53756629	3905575				31880209	45067804	12660755	17961763
Monoterpenes	Isopulegol isomer II	1154 S		COV_133
ND	NI (mz 41, 95, 109!, 119, 134, 152)	1154		COV_134
Monoterpenes	Citronellal	1155	1156 S	COV_135																					1080252	204553								2516065	5088428	4485263	120840717	787784278	809491580	603908414	1539575				7384220	8638935	2644584	3338068
Monoterpenes	Pinocamphone <trans->	1160	1160 F	COV_136
Monoterpenes	Isoisopulegol	1165	1160 F	COV_137
Monoterpenes	Pinocarvone	1162	1164 F	COV_138												2043958
Monoterpenes	Isoborneol	1165	1165 F	COV_139
Monoterpenes	Isoneral	1166	1165 Nistweb	COV_140
ND	NI (mz 67, 93!, 121, 136, 168)	1168		COV_141																														21335130
Monoterpenes	Chrysanthenol <cis-> (mz 41, 67, 81, 94!, 109!, 152)	1169	1166 F	COV_142																															38087234	39456944	9003709	22940188	29690517	25351392	18244032				105850404	169024527	34484084	51060902
Monoterpenes	Borneol	1169	1173 F	COV_143												135153266									608631
Monoterpenes	sim. Isogeranial	1169	1179 F	COV_144																														18954210
ND	NI (mz 43, 79, 109!, 152, 168)	1170		COV_145
Monoterpenes	Terpineol <delta->	1170	1170	COV_146
Benzenoids and phenyl propanoids	Benzoate <ethyl->	1172	1170 F	COV_147
Monoterpenes	Pinocamphone <cis->	1173	1176 F	COV_148
Benzenoids and phenyl propanoids	sim. Geranyl benzoate	1173		COV_149
ND	NI (mz 65,77,91,117!,149,154)	1176		COV_150
ND	NI (mz, 71, 95!, 111, 151, 166)	1177		COV_151																																										16202323	5096319	10599086
Monoterpenes	Terpinen-4-ol	1178	1180 F	COV_152												880398									8650575																4279507			423087	77675994				951127
Monoterpenes	Rose furan oxide	1178	1180	COV_153																														4361352	2511086		1742003	4101673	7603360
Monoterpenes	sim. Neoisoisopulegol	1181		COV_154
Benzenoids and phenyl propanoids	cf. Benzaldehyde, 2,4-dimethyl-	1184	1190 F	COV_155												789029
Monoterpenes	Isogeranial	1183	1179 F	COV_156																														49832617	50452253	51459101	12307742	32814967		31742515	23992722				124559680	199714232	43077408
Monoterpenes	sim. Isoisopulegol	1186		COV_157
Aliphatics	Hex-(3Z)-enyl butyrate	1186	1187 F	COV_158	15478859	4202498						14917128		5234481	660976
Monoterpenes	Isocarveol <trans->	1187	1189 F	COV_159
Monoterpenes	Terpineol <alpha->	1190	1195 F	COV_160																					5665311																926747				119719283		2258225	3273840	497544
ND	NI (mz 82, 93, 107, 136, 150)	1190		COV_161												1538742
Benzenoids and phenyl propanoids	Salicylate <methyl->	1194	1192 F	COV_162								9673325						274512							712403								238319								5950614				43900557	28937279	4403717	11009799
ND	NI (mz 43, 81, 97!, 125, 168)	1194		COV_163
ND	NI (mz 41, 69!, 84, 111, 126, 154)	1195		COV_164
Monoterpenes	Myrtenal	1195	1202 F	COV_165												3758091
Aliphatics	Dec-(4Z)-enal	1196	1196 F	COV_166																																	1882675	5683118	4838589	3845352
ND	NI (mz 43, 69, 97!, 123, 139, 166)	1197		COV_167
Benzenoids and phenyl propanoids	Methyl chavicol (estragole)	1198	1196 A	COV_168												12572640																									1351946				25905274	12530832	5383006
Monoterpenes	Myrtenol	1200	1202 F	COV_169
Aliphatics	Dodecane	1200	1200 F	COV_170																																							220093	233221
Aliphatics	Decanal <n->	1205	1208 F	COV_171																	25942524	17691176	984624			333918					136831		1301363				12996367	36005578	42613122	25420542
ND	NI (mz 41,55,83!,95,109,152)	1206		COV_172																																						158203	400827	733756
Monoterpenes	Verbenone	1208	1208 F	COV_173												1870601					4708317	24662309
Monoterpenes	sim. Cosmen-2-ol	1208		COV_174
ND	NI (mz 91, 117, 131, 145!)	1212		COV_175
ND	NI (mz 57, 105, 133, 184)	1213		COV_176												793207
Benzenoids and phenyl propanoids	2,5-Dimethylbenzaldehyde	1214	1208 NistWeb	COV_177																																								519155
ND	NI (mz 105, 119, 133, 148!)	1215		COV_178
Aliphatics	Acetate <octyl->	1221	1214 F	COV_179
Monoterpenes	sim. Verbenone	1225	1219 S	COV_180																														9718872		13216565
Monoterpenes	Carveol <trans->	1225	1223 F	COV_181												755831																													12039118	22866516		8252480
ND	NI (mz 43!, 71, 97, 113, 150)	1225		COV_182
ND	NI (mz 43!, 81, 97, 125 139, 168)	1227		COV_183
Miscellaneous Cyclic Compounds	Hydroxy methyl furfural	1227	1225 F	COV_184
Monoterpenes	Fenchyl acetate	1227	1227 S	COV_185
ND	NI (mz 93,95, 121, 150)	1227		COV_186												1354805
Monoterpenes	Citronellol	1229	1228 F	COV_187																																	120548175	293570688	324000858	282982190
Monoterpenes	Nerol	1230	1229 F	COV_188																					2167221										34740381	26525093
Aliphatics	(Z)-3-hexenyl 2-methylbutanoate	1232	1231 F	COV_189								1379349	336406	349781
Monoterpenes	Carvacryl methyl ether	1234	1239 F	COV_190
Aliphatics	NI (mz 43!,69,109,125,155,166)	1234		COV_191
Aliphatics	NI (mz 69!, 82, 109, 126, 148)	1238	1240 F	COV_192																																									9335505	10530832		1607915
Monoterpenes	Ascaridole	1239	1240 F	COV_193
Aliphatics	Isovalerate <cis-3-hexenyl->	1236	1235 F	COV_194																																					3108470				5478929	7632274
Monoterpenes	Ocimenone <trans->	1239	1240 F	COV_195												1237116
Benzenoids and phenyl propanoids	Cuminaldehyde	1240	1247 F	COV_196																																													1984593
Aliphatics	Isovalerate <hexyl->	1242	1242 F	COV_197
Monoterpenes	Neral	1244	1244 S	COV_198																					442653									120081842	210419732	150112389	42552760	141264528	148374559	130912058	124702366				751044326	757752733	182994411	184450439
Monoterpenes	Carvacrol, methyl ether	1245	1239 F	COV_199																																						74632	256617	177336
Monoterpenes	Carvone	1245	1246 F	COV_200																					707646
Monoterpenes	Citral	1249	1246 S	COV_201
ND	NI (mz 41,69!,125,139,168)	1251		COV_202
Benzenoids and phenyl propanoids	Thymoquinone	1250	1250 F	COV_203
ND	NI (mz 71, 99, 126)	1253		COV_204																					715842
Monoterpenes	sim. Neryl formate	1255		COV_205
Monoterpenes	Geraniol	1256	1257 S	COV_206																					1528174									6354234	115327292	75305106	255225359	589042998	572049899	519984352
Monoterpenes	(Z)-Piperitenone epoxide	1256	1255 F	COV_207
ND	NI (mz 41,69!,110,125,139,152)	1258		COV_208
Monoterpenes	Chrysanthenyl acetate <cis->	1261	1257 F	COV_209												867682
ND	NI (mz 41,69!,125,139,168)	1259		COV_210
Monoterpenes	Methyl citronellate	1262	1260 S	COV_211
ND	NI (mz 41, 67!, 96, 109, 137)	1263		COV_212
ND	NI (mz 43, 107!, 121, 139!, 153)	1263		COV_213
ND	NI (mz 41, 67!, 81, 96!, 109, 151)	1265		COV_214
Monoterpenes	Isopiperitenone	1271		COV_215												4143769
ND	NI (mz 43,69!,97,125!,150,168)	1272		COV_216
Benzenoids and phenyl propanoids	Ethyl salicylate	1272	1270 F	COV_217
ND	NI (mz 82)	1273		COV_218												1553836
ND	NI (mz 43!, 79, 107, 125, 150)	1277		COV_219
Monoterpenes	Geranial	1277	1275 S	COV_220																					835930									174457301	329358118	282596945	48816803	320901258	292766380	229391327	210806935				822681266	893921726	220516963	245661578
ND	NI (mz 43, 69!, 85, 97, 111, 126)	1281		COV_221
Monoterpenes	Terpinen-7-al <alpha->	1284	1287 F	COV_222																																													304282
ND	NI (mz 41,91,109,119!,134,150)	1286		COV_223
Monoterpenes	Bornyl acetate	1286	1285 F	COV_224												31562601									310380
ND	NI (mz 43!, 67, 111, 123, 138)	1287		COV_225
ND	NI (mz 43, 91, 107, 125!, 135, 168)	1288		COV_226
ND	NI (mz 91, 109!, 119!, 134, 147)	1289		COV_227
Monoterpenes	Terpinen-7-al <gamma->	1290	1292 F	COV_228																																													350140
ND	NI (43, 69!, 107, 179!, 194)	1291		COV_229
N-Containing Compound	Indole	1292	1297 F	COV_230
Aliphatics	Undecan-2-one	1292	1294 F	COV_231																														3501128	6982170	1899776
Monoterpenes	Thymol	1292	1293	COV_232
ND	NI (mz 67, 107, 135, 150)	1293		COV_233												1848412
ND	NI (mz 59,69, 81, 127)	1294		COV_234																														2669470
ND	NI (mz 43, 81, 109!, 119, 127, 170)	1298		COV_235
Aliphatics	Tridecane <n->	1300	1300 F	COV_236
Monoterpenes	Carvacrol	1301	1300 F	COV_237																											144489
ND	NI (mz 43, 97, 125!, 140, 178)	1303		COV_238
Monoterpenes	Isoascaridole	1306	1306 F	COV_239																																					2101897				54517641	9929294
Aliphatics	Undecanal	1306	1309 F	COV_240																													276728
ND	NI (mz 43!, 69, 97, 119, 152, 168)	1308		COV_241
ND	NI (mz 43!, 97!, 125, 168)	1315		COV_242																																					789645					5177792		3825373
Irregular Terpenes	Cryptone<4-hydroxy->	1318	1318 F	COV_243
Monoterpenes	cf. Chrysanthenone epoxide	1318	1317 NISTWEB	COV_244												640887
ND	NI (mz 79, 91, 107, 122, 166)	1324		COV_245												3704380
C5-Branched chain compounds	Tiglate <(3z)-hexenyl->	1325	1325 F	COV_246																																					3436989				17506708
Monoterpenes	Methyl geranate	1326	1326 S	COV_247
ND	NI (mz 43,69,97!,125,135,150)	1328		COV_248
Sesquiterpenes	Bicycloelemene	1328	1330 Nistweb	COV_249
Monoterpenes	Myrtenyl acetate	1331	1326 F	COV_250
ND	NI (mz 55, 67, 82!, 97, 126)	1331	1326 S	COV_251																																									14199793	4051331		2461920
Monoterpenes	Menthol<8-hydroxy-neo->	1332 F		COV_252
ND	NI (mz 43, 79, 107!, 123, 137, 166)	1333		COV_253
Sesquiterpenes	Elemene <delta->	1337	1335 F	COV_254																													257880																1159466
ND	NI (mz 79, 93, 95, 105, 119, 134, 147, 161, 189, 204)	1338		COV_255
Monoterpenes	Piperitenone	1341	1340 A	COV_256												4426028
ND	NI (mz 41!,69,107,135,150)	1341		COV_257
ND	NI (mz 41,93,107,121!,136,204)	1342		COV_258
ND	NI (mz 43!, 93, 108, 137, 152)	1343		COV_259
ND	NI (mz 43,97,125!,135,150,168)	1345		COV_260
Sesquiterpenes	Cubebene <alpha->	1350	1349 F	COV_261																	82877383	70241136	734829	8198452																	1976706				38342743		787061	2883787
Sesquiterpenes	Longipinene <alpha->	1351	1352 F	COV_262
ND	NI (mz 79, 95, 147, 189)	1353		COV_263
Monoterpenes	Citronellyl acetate	1356	1354 S	COV_264																																	23747300	173587681	51409273	24895925
ND	NI (mz 51, 77, 91, 105, 134!, 162)	1359		COV_265
Benzenoids and phenyl propanoids	Eugenol	1361	1366 S	COV_266																																									6975227		1852828	2136037
ND	NI (mz 79, 93, 95, 108, 147, 189)	1363		COV_267
Monoterpenes	Nerylacetate	1367	1366 S	COV_268
ND	NI (mz 43!, 67, 95, 137!, 166) 1364	1364		COV_269
ND	NI (mz 41,91,105!,161,204)	1371		COV_270
Sesquiterpenes	Cyclosativene	1367	1367 F	COV_271																					400646		185393
ND	NI (mz 43,97,125!,135,150,168)	1368		COV_272
Sesquiterpenes	Ylangene <alpha->	1372	1371 F	COV_273																																	3077230	3814356		2849750
Monoterpenes	(E)-Piperitenone oxide	1373	1372 F	COV_274
Sesquiterpenes	Copaene <alpha->	1379	1375 F	COV_275														1294364			194564180	125621093	1152266	14003915	5490201	2031813	3125442	316280	4575368	471321	76726		197590								7188301		625630	760187	302867450	9263418	2726647	35439067	1491632
ND	NI (mz 41, 93, 119!, 161, 189, 204)	1382		COV_276
ND	NI (mz 41,67,81!,93,161,189)	1385		COV_277
Benzenoids and phenyl propanoids	Hydrocoumarin	1384	1386 F	COV_278
Monoterpenes	Geranyl acetate	1386	1380 F	COV_279																														1428542	4030116	1558886	47737932	317609713	59673152	32260129
Sesquiterpenes	Bourbonene <beta->	1386	1382 F	COV_280																	59460436	90607261	1314025	12242893																	515213				88983485	8952658	6231501	7662947
Sesquiterpenes	Sesquithujene <7-epi->	1390	1387 F	COV_281
ND	NI (mz 91,105,119,161!,204)	1391		COV_282
Sesquiterpenes	Cubebene <beta->	1393	1392 F	COV_283																	188400937	51230630	809302	3807496																								7876199
Sesquiterpenes	Elemene <beta->	1392	1390 F	COV_284															552953						1466030						57712		180517				12726262	16520977	10313874	6516827	10033375				288308655	18863272		10362297	753330
ND	NI (mz 41,105,131!,159,187,202)	1396		COV_285
ND	NI (mz,43, 67!, 95,119, 161)	1396		COV_286
ND	NI (mz 93,107,122!,161,204)	1397		COV_287
ND	NI (mz 41, 81!, 105!, 123, 161!, 204)	1397		COV_288
ND	NI (41, 91, 105, 119, 161!, 204)	1399		COV_289
Miscellaneous Cyclic Compounds	trans Jasmone	1399	1398 S	COV_290
Aliphatics	Tetradecane <n->	1400	1400 F	COV_291																										66239
ND	NI (mz 69, 105, 123, 137, 151, 166!)	1401		COV_292
Sesquiterpenes	Cyperene	1403	1407 F	COV_293																																							1124878	655514
Benzenoids and phenyl propanoids	Methyleugenol	1405	1407 S	COV_294
Sesquiterpenes	Longifolene	1406	1412 F	COV_295
Aliphatics	Dodecanal	1409	1410 F	COV_296
Sesquiterpenes	Isocomene <beta->	1411	1413 F	COV_297
Sesquiterpenes	Gymnomitra-3(15),4-diene	1412	1413 Nistweb	COV_298
Sesquiterpenes	Cedrene <alpha->	1412	1414 F	COV_299
Sesquiterpenes	Gurjunene <alpha->	1412	1406 F	COV_300																						234423
Sesquiterpenes	Maaliene <beta->	1412	1415 F	COV_301																							441541
Sesquiterpenes	Barbatene<alpha->	1413	1412 F	COV_302																								51980
Sesquiterpenes	Bergamotene <alpha-, cis->	1416	1416 F	COV_303																					510811
Sesquiterpenes	Cedrene <beta->	1421	1423 F	COV_304
ND	NI (mz 41,91,105!,161,189,204)	1420		COV_305
Sesquiterpenes	Caryophyllene <(E)->	1421	1424 F	COV_306				316533			116900								1250947		1154704189	730847768	56921835	128209484	2610086	202452					194915	488700	4060912		4386053	4930218	72242439	178054590	160803893	112833687	44335985	536563	10834987	15592963	1089903412	201555087	71935982	78885284	13329697
ND	NI (mz 91, 107, 119, 131, 187, 202)	1428		COV_307
Sesquiterpenes	Maaliene <gamma->	1429	1430 F	COV_308
Sesquiterpenes	Calarene	1434	1434 F	COV_309
Sesquiterpenes	Elemene<gamma->	1434	1432 F	COV_310															1104245										175163				216681																381561
Sesquiterpenes	Copaene <beta->	1437	1433 F	COV_311																	56141192	33722613		5072328																	1953970				40280599		3206230	9727834
Sesquiterpenes	Bergamotene <alpha-, trans->	1437	1432 F	COV_312																					7837397	1622519	334171	171515	852970				235529		2818838	1198119						140104
ND	NI (mz 91, 105, 133, 161!, 189, 204)	1437		COV_313
Sesquiterpenes	Thujopsene <cis->	1438	1433 F	COV_314
Sesquiterpenes	Gurjunene <beta->	1440	1437 F	COV_315
Sesquiterpenes	Guaiene <alpha->	1441	1438 F	COV_316																																									16450407	3212552	1205278	2029999
Sesquiterpenes	Maaliene <alpha-	1442	1438 F	COV_317
Sesquiterpenes	Aromadendrene	1443	1438 F	COV_318
Benzenoids and phenyl propanoids	Coumarin	1443	1438 F	COV_319
ND	NI (mz 41,69!,93,120,161)	1444		COV_320
Sesquiterpenes	Eudesma-5,11-diene	1446	1445 F	COV_321
Sesquiterpenes	Isogermacrene D	1447	1447 F	COV_322																	44494175	22462922		2745977																					23236176		2277617	4881966
Sesquiterpenes	Cadina-3,5-diene	1447	1452 F	COV_323
Sesquiterpenes	Selina-5,11-diene	1445	1445 F	COV_324
Sesquiterpenes	Barbatene<beta->	1449	1445 F	COV_325
Sesquiterpenes	Guaia-6,9-diene	1450	1444 F	COV_326
Sesquiterpenes	Prezizaene	1452	1457 F	COV_327
Monoterpenes	Geranylacetone	1453	1456 S	COV_328																													479867
ND	NI (mz 91, 108!, 147, 189, 204)	1453		COV_329
ND	NI (mz 91!, 119, 133, 161, 189)	1456		COV_330
Sesquiterpenes	Humulene <alpha->	1456	1454 F	COV_331																	210012778	97078242	1798328	10427179									249869				17446795	27829730	24900489	11441629	10500120	342710	946646	2011868	214612093	29097506	12069342	13283778	508069
Sesquiterpenes	Alloaromadendrene	1461	1458	COV_332
Sesquiterpenes	Farnesene <(E)-, beta->	1460	1452 F	COV_333																					1453961																						1615630	8481185
Sesquiterpenes	Santalene <beta->	1462	1459 F	COV_334
ND	NI (mz 69!,93,122,161,189,204)	1463		COV_335
ND	NI (mz 79, 93,105, 119!, 189, 204) - sim. Amorpha-4,11-diene	1463		COV_336
Sesquiterpenes	Caryophyllene <9-epi-(E)->	1464	1464 F	COV_337														6537897			16287748	7039489				7942967	8195230	633193	1117603												1436227			867289	20173559		2751643	8546537
ND	NI (mz 105, 133, 147, 161, 189!, 204!)	1464		COV_338
Sesquiterpenes	Muurola-4(14),5-diene <cis->	1465	1466 F	COV_339																	13048760	11082635
Sesquiterpenes	Acoradiene<beta->	1469	1471 F	COV_340
ND	NI (mz 91, 105, 133, 161!, 189, 204)	1469		COV_341
Sesquiterpenes	Naphthalene <1,2,3,4,6,7,8,8a-octahydro-, 1,8a-dimethyl-7-(1-methylethenyl)-, (1R,7S,8aS)->	1471	1473	COV_342
Sesquiterpenes	Aristolochene<4,5-di-epi->	1472	1473 F	COV_343
Sesquiterpenes	Selina-4,11-diene	1475	1476 F	COV_344
Sesquiterpenes	Acoradiene<10-epi-beta-> 1476 1471 F	1476	1475 A	COV_345
Sesquiterpenes	Gurjunene <gamma->	1476	1476 F	COV_346
ND	NI (mz 93, 133, 161!, 189, 204, 220)	1476		COV_347
Sesquiterpenes	Muurolene <gamma->	1479	1478	COV_348																		26410454																				100311		634956	19309560
Sesquiterpenes	Himachalene <gamma->	1479	1482 F	COV_349																	5100415			4405121
Sesquiterpenes	Chamigrene <beta->	1479	1479 F	COV_350																						232834
Sesquiterpenes	Cadina-1(6),4-diene<trans->	1481	1477 F	COV_351
ND	NI (mz 81, 105, 133, 161!, 204)	1481		COV_352
Sesquiterpenes	Germacrene D	1483	1480 F	COV_353																	367665166	78404007	970456	14451223
Sesquiterpenes	Curcumene <alpha->	1484	1480 F	COV_354																					1259599	3456
Sesquiterpenes	Amorphene <gamma->	1484	1490 F	COV_355																																	21008703	33691339							185074114		9513904
Sesquiterpenes	Bergamotene <beta-, trans->	1487	1483 F	COV_356																									307930	16243
Sesquiterpenes	Selinene <beta->	1488	1492 F	COV_357																					1202635
ND	NI (mz 91!, 105, 133, 161, 189, 204)	1489		COV_358
ND	NI (mz 69, 105, 148, 166!, 204)	1489		COV_359												901675
Sesquiterpenes	Eremophilene	1489	1491 F	COV_360
Sesquiterpenes	Viridiflorene	1491	1497 F	COV_361														782410								528330	548297
ND	NI (mz 79, 93, 105!, 133, 148, 189)	1492		COV_362
ND	NI (mz 41, 91,119,147,161!,204)	1492		COV_363																	10943852	5662891
ND	NI (mz 91, 133, 145, 161!, 189!, 204)	1494		COV_364
Sesquiterpenes	Zingiberene <alpha->	1495	1496 F	COV_365
Sesquiterpenes	(Z,E)-alpha-Farnesene	1496	1498 S	COV_366
Aliphatics	2-Tridecanone	1497	1495 F	COV_367
Sesquiterpenes	Selinene <alpha->	1497	1501 F	COV_368
Sesquiterpenes	Bicyclogermacrene	1498	1497 F	COV_369																																									39170515	7213528
Sesquiterpenes	Curzerene	1498	1493 F	COV_370															2892270
ND	NI (mz 81, 105, 119, 161!, 189, 204)	1499		COV_371
ND	NI(mz,41,105!,119!,161,189,204)	1499		COV_372																	41928385	10254668
Sesquiterpenes	Epizonarene	1500	1506 F	COV_373
Sesquiterpenes	Muurolene <alpha->	1501	1497 F	COV_374																																						221341
Sesquiterpenes	Amorphene <epsylon->	1502	1502 F	COV_375
Sesquiterpenes	Bisabolene <(Z)-, alpha->	1504	1503 F	COV_376																					559753
Sesquiterpenes	Bulnesene <alpha->	1507	1505 F	COV_377
ND	NI (mz 77, 91, 119, 162!, 204)	1506		COV_378
ND	NI (mz 41, 105!,119!,161,189,204)	1507		COV_379																		99523564	1666681
Sesquiterpenes	Cuparene	1508	1513 F	COV_380														138542
Sesquiterpenes	(E,E)-alpha-Farnesene	1508	1504 F	COV_381																	93295421			15105177
Sesquiterpenes	Bisabolene <beta->	1509	1508 F	COV_382																					5510403				178561													905104							453282
ND	NI (mz 93, 105, 119!, 161, 204)	1512		COV_383
ND	NI (mz 93, 108, 134, 161, 189, 204)	1515		COV_384
Sesquiterpenes	Cadinene <gamma->	1516	1512	COV_385																	28911540	21102778															31007779	67534660		19786200
Sesquiterpenes	Selinene<7-epi-alpha->	1519	1518F	COV_386																					955322
Sesquiterpenes	Calamenene <trans->	1524	1527 F	COV_387
Benzenoids and phenyl propanoids	Ethyl p-ethoxybenzoate	1523	1522 NW	COV_388								9788458
Sesquiterpenes	Cadinene <delta->	1525	1518 F	COV_389														353767			50435828	49333814	917596		1310047												5433909			3244680
Sesquiterpenes	Zonarene	1525	1526	COV_390
Sesquiterpenes	Sesquiphellandrene <beta->	1526	1523 F	COV_391
ND	NI (mz 105, 119, 134,161, 189, 204)	1527		COV_392
Sesquiterpenes	Bisabolene <(E)-gamma->	1532	1528 F	COV_393
Sesquiterpenes	Cadinene <alpha->	1538	1538 F	COV_394
Sesquiterpenes	Cadina-1,4-diene <trans->	1539	1536 F	COV_395
Sesquiterpenes	Selina-4(15),7(11)-diene	1541	1540 F	COV_396
Sesquiterpenes	Sesquisabinene hydrate <cis->	1543	1544 F	COV_397
ND	NI (mz 133, 161, 189, 204, 218)	1546		COV_398
Sesquiterpenes	Selina-3,7(11)-diene	1548	1546 F	COV_399
Sesquiterpenes	Elemol <alpha->	1550	1546 F	COV_400																																					6790708				125054027	3828923
Sesquiterpenes	Calacorene <alpha->	1552	1544 F	COV_401
Sesquiterpenes	Germacrene B	1557	1557 F	COV_402
ND	NI (mz 43, 82!, 109!, 161!, 189, 204)	1561		COV_403
Monoterpenes	Nerolidol <(E)->	1564	1561 F	COV_404
Sesquiterpenes	Calacorene <beta->	1568	1564 F	COV_405
ND	NI (mz 91, 105!, 157, 199, 214!)	1569		COV_406
Sesquiterpenes	Caryophyllene alcohol	1571	1575 F	COV_407
ND	NI (mz 43, 81!, 105, 161, 204, 222)	1574		COV_408																	31852714
ND	NI ( mz 43, 81, 105, 119, 161, 204)	1577		COV_409
ND	NI (mz 41,79,108!,205,220)	1578		COV_410
Sesquiterpenes	Thujopsan-2-alpha-ol	1579	1581 F	COV_411
Sesquiterpenes	Caryophyllene oxide	1585	1587 F	COV_412																	55517738	19287890		1707751													4710308	745468			2145240				40716765		5321565	1050049	320559
ND	NI (mz 105, 145, 163, 175, 203, 218)	1584		COV_413
ND	NI (mz, 43, 93, 109, 161, 189, 222)	1585		COV_414
ND	NI (mz 131, 145, 173, 187, 202)	1591		COV_415
ND	NI (mz 43, 71, 111, 159)	1596		COV_416								16631117
Sesquiterpenes	Guaiol	1597	1603	COV_417
Sesquiterpenes	Elemenone<trans-beta->	1604	1600 F	COV_418
Sesquiterpenes	Copaborneol	1606	1613 F	COV_419
ND	NI (mz 59, 145,185, 218)	1608		COV_420
Sesquiterpenes	Humulene epoxide II	1610	1613 F	COV_421
Sesquiterpenes	Diepicubenol <1,10->	1614	1614 F	COV_422
ND	NI (mz 81, 135, 161, 177, 189, 204, 222)	1618		COV_423
ND	NI (mz 131, 145, 159, 187, 202, 234)	1622		COV_424
ND	NI (mz 109, 152, 175, 185, 200, 222)	1626		COV_425
Sesquiterpenes	Muurola-4,10(14)-dien-1-beta-ol	1631	1632 F	COV_426
Sesquiterpenes	Epicubenol	1632	1631 F	COV_427
Sesquiterpenes	Selina-1,3,7(11)-trien-8-one	1635	1633 F	COV_428
ND	NI (mz 59, 117, 145, 175, 185, 218)	1636		COV_429
Sesquiterpenes	Caryophylla-4(12),8(13)-dien-5b-ol	1636	1636 F	COV_430
ND	NI (mz 41,93!,121!,159,220)	1639	1636 F	COV_431
Sesquiterpenes	Cadinol <epi-alpha-	1642	1640 F	COV_432
ND	NI (mz 95, 121, 161, 179, 204, 222)	1646		COV_433
ND	NI (mz 135, 163, 176, 202, 220)	1649		COV_434
Sesquiterpenes	Eudesmol <beta->	1654	1656 F	COV_435
ND	NI (mz 95, 109, 121, 151, 205, 220)	1658		COV_436
ND	NI (mz 41,91!,109,131,187,202)	1658		COV_437
Sesquiterpenes	Intermedeol	1663	1668 F	COV_438
Sesquiterpenes	Caryophyllene <14-hydroxy-9-epi-(E)->	1666	1671	COV_439
ND	NI (mz 43,91,119,191!,234)	1667		COV_440
ND	NI (mz 41,79,95!,149,187,221)	1670		COV_441
ND	NI (mz 59, 107, 142, 157, 200, 234)	1671		COV_442
Sesquiterpenes	Cadalene	1679	1677 F	COV_443
Sesquiterpenes	Muskatone	1682	1681 F	COV_444
ND	NI (mz 93, 109, 119, 163, 205, 220)	1687		COV_445
ND	NI (mz 67, 107, 121, 135, 204,222)	1699		COV_446
ND	NI (mz 43, 57, 97)	1699		COV_447								4000826
Sesquiterpenes	Sinensal <beta->	1700	1701 F	COV_448
ND	NI (mz 105, 147, 161, 189, 204, 218)	1716		COV_449
Aliphatics	Tetradecanoate <methyl->	1727	1727 F	COV_450
Sesquiterpenes	Selina-1,3,7(11)-trien-8-one epoxide	1746	1750 F	COV_451
ND	NI (mz 117, 145, 159, 186, 202, 230)	1747		COV_452
ND	NI (mz 93, 121, 161, 175, 203, 218)	1754		COV_453
ND	NI (mz 91, 159, 175, 201, 218)	1769		COV_454
ND	NI (mz 119, 132, 147, 161, 190, 218)	1776		COV_455
Aliphatics	Octadecane	1800	1800F	COV_456
ND	NI (mz 41,108!, 159,187,215,230)	1802		COV_457
Aliphatics	Tetradecanoate <isopropyl->	1826 F		COV_458																													313660
DiterpeneS	Beyerene	1938	1933 F	COV_459
[truncated: 95 more columns]
